# Supplementary material
Source: PubMed Central journal article supplement (PMC3525668)
Supplement: NIHMS1700-supplement-Suppl_Table_1.pdf [file NIHMS1700-supplement-Suppl_Table_1.pdf]

**Supplementary Table S1.** Demographic and clinical characteristics of subjects included in gene expression analysis

| Group | Age | Gender | PMI  | pH   | Cause of death        | Diagnosis           | Toxicology                                                                 |
|-------|-----|--------|------|------|-----------------------|---------------------|----------------------------------------------------------------------------|
| C     | 32  | Male   | 26.5 | 6.82 | Cardiac arrest        | -                   | -                                                                          |
| C     | 19  | Male   | 32   | 6.55 | Car accident          | -                   | -                                                                          |
| C     | 47  | Male   | 24   | 6.49 | Cardiac arrest        | AD                  | -                                                                          |
| C     | 30  | Male   | 36   | 6.37 | Cardiac arrest        | -                   | -                                                                          |
| C     | 28  | Male   | 27   | 6.32 | Car accident          | -                   | -                                                                          |
| C     | 41  | Male   | 24   | 6.0  | Myocardial infarction | -                   | -                                                                          |
| C     | 31  | Male   | 29.5 | 6.67 | Car accident          | -                   | -                                                                          |
| C     | 46  | Male   | 20   | 6.42 | Myocardial infarction | -                   | -                                                                          |
| C     | 27  | Male   | 20.5 | 6.55 | Cardiac arrest        | -                   | -                                                                          |
| C     | 51  | Male   | 15   | 6.83 | Car accident          | AD, Adj.D.          | Alcohol                                                                    |
| C     | 54  | Male   | 24   | 6.75 | Car accident          | AA,SP,H             | -                                                                          |
| C     | 58  | Male   | 24   | 6.09 | Sudden death          | AD                  | -                                                                          |
| BD    | 24  | Male   | 30   | 6.68 | Drug overdose         | BDI, AD, CD         | Alcohol, cocaine, PCP, morphine, clonazepam, sertraline, doxepine, lithium |
| BD    | 51  | Male   | 30   | 6.88 | Hanging               | BDI, AD             | Lithium                                                                    |
| BD    | 72  | Male   | 46   | 6.82 | Hanging               | BDI                 | Valproic acid, phenytoin                                                   |
| BD    | 28  | Male   | 16   | 6.51 | Hanging               | BDI                 | -                                                                          |
| BD    | 43  | Male   | 30   | 6.79 | Hanging               | SADB                | -                                                                          |
| BD    | 38  | Female | 60   | 6.61 | Hanging               | BDI, SP, GAD        | -                                                                          |
| BD    | 57  | Male   | 25   | 6.72 | Workplace accident    | BDI                 | Valproic acid                                                              |
| BD    | 33  | Male   | 65   | 6.75 | Hanging               | BDI, AD, CD, PD; PG | -                                                                          |

C- control; BD – bipolar disorder

PMI – postmortem interval

Adj.D – Adjustment disorder; AA- alcohol abuse; AD – alcohol dependence; BDI – bipolar disorder I; CA- cannabis abuse; CD – cannabis dependence; GAD – generalized anxiety disorder; H – hypochondriasis; PD – poly drug dependence; PG – pathologic gambling; SADB – schizoaffective disorder, bipolar type; SP – specific phobia
