# Supplementary material
Source: PubMed Central journal article supplement (PMC3525668)
Supplement: NIHMS1700-supplement-Suppl_Table_2.pdf [file NIHMS1700-supplement-Suppl_Table_2.pdf]

**Supplementary Table S2.** Demographic and clinical characteristics of the SMRI dataset

| Group | Age | Gender | PMI | pH   | Cause of death       | Diagnosis |
|-------|-----|--------|-----|------|----------------------|-----------|
| C     | 47  | Male   | 36  | 6.57 | Cardiac              | -         |
| C     | 34  | Female | 24  | 6.87 | Cardiac              | -         |
| C     | 45  | Male   | 29  | 6.94 | Cardiac              | -         |
| C     | 47  | Male   | 21  | 6.81 | Cardiac              | -         |
| C     | 34  | Male   | 22  | 6.48 | Cardiac              | -         |
| C     | 39  | Female | 58  | 6.46 | Cardiac              | -         |
| C     | 48  | Male   | 24  | 6.91 | Cardiac              | -         |
| C     | 31  | Male   | 11  | 6.13 | Pulmonary Embolism   | -         |
| C     | 35  | Male   | 52  | 6.70 | Myocarditis          | -         |
| C     | 51  | Male   | 22  | 6.71 | Cardiac              | -         |
| C     | 40  | Male   | 38  | 6.67 | Cardiac              | -         |
| C     | 46  | Male   | 31  | 6.67 | Cardiac              | -         |
| C     | 38  | Female | 33  | 6.00 | Cardiac              | -         |
| C     | 47  | Male   | 11  | 6.60 | Cardiac              | -         |
| C     | 32  | Male   | 13  | 6.57 | Cardiac              | -         |
| C     | 51  | Male   | 31  | 6.70 | Cardiac              | -         |
| C     | 50  | Male   | 49  | 6.75 | Cardiac              | -         |
| C     | 48  | Male   | 31  | 6.86 | Cardiac              | -         |
| C     | 53  | Male   | 9   | 6.40 | Cardiac              | -         |
| C     | 33  | Female | 29  | 6.52 | Asthma               | -         |
| C     | 49  | Female | 45  | 6.72 | Cardiac              | -         |
| C     | 55  | Male   | 31  | 6.70 | Cardiac              | -         |
| C     | 35  | Male   | 24  | 7.03 | Cardiac              | -         |
| C     | 45  | Male   | 18  | 6.81 | Cardiac              | -         |
| BD    | 19  | Male   | 12  | 5.97 | Intentional overdose | BDI       |
| BD    | 48  | Male   | 23  | 6.90 | Hanging              | BDI       |
| BD    | 42  | Female | 49  | 6.65 | Intentional overdose | BDI       |
| BD    | 56  | Male   | 23  | 6.07 | Intentional overdose | BDI       |
| BD    | 64  | Male   | 16  | 6.10 | Pneumonia            | SAD       |
| BD    | 35  | Female | 17  | 6.10 | CO2 poisoning        | BDI       |
| BD    | 41  | Female | 28  | 6.44 | Cardiac              | BDI       |
| BD    | 54  | Male   | 44  | 6.50 | Intentional overdose | BDII      |
| BD    | 33  | Female | 24  | 6.51 | Hanging              | BDI       |
| BD    | 49  | Female | 38  | 6.39 | Intentional overdose | BDI       |
| BD    | 42  | Male   | 32  | 6.65 | Drowning             | BDNOS     |
| BD    | 50  | Female | 62  | 6.51 | Inentional overdose  | BDI       |
| BD    | 48  | Female | 18  | 6.50 | Cardiac              | BDI       |
| BD    | 35  | Male   | 22  | 6.58 | Drowning             | BDI       |
| BD    | 43  | Female | 39  | 6.74 | Intentional overdose | BDI       |
| BD    | 44  | Male   | 19  | 6.74 | Hanging              | BDI       |
| BD    | 56  | Female | 26  | 6.58 | Drowning             | BDII      |
| BD    | 44  | Female | 37  | 6.37 | Myocarditis          | BDI       |
| BD    | 45  | Male   | 28  | 6.35 | Cardiac              | BDI       |
| BD    | 63  | Female | 32  | 6.97 | Cardiac              | BDII      |
| BD    | 51  | Male   | 23  | 6.67 | Cardiac              | BDI       |
| BD    | 29  | Male   | 60  | 6.70 | CO2 poisoning        | BDII      |
| BD    | 29  | Male   | 48  | 6.39 | Jumped               | BDI       |

SMRI – Stanley Medical Research Institute; C- control; BD – bipolar disorder ; PMI – postmortem interval; BDI – bipolar disorder I; BDII – bipolar disorder II; BDNOS – bipolar disorder not otherwise specified; SAD – schizoaffective disorder
