# Supplementary material
Source: PubMed Central journal article supplement (PMC3525668)
Supplement: NIHMS1700-supplement-Suppl_Table_3.pdf [file NIHMS1700-supplement-Suppl_Table_3.pdf]

**Supplementary Table S3.** Genes tested in the SMRI dataset with  $p$  values of  $<0.1$

| Gene   | BA | Probe set   | Microarray |       |
|--------|----|-------------|------------|-------|
|        |    |             | FC         | $p$   |
| MRPS25 | 46 | 224015_s_at | 1.22       | 0.033 |
| SYN2   | 46 | 210247_at   | 1.31       | 0.059 |
| MAGI1  | 46 | 225474_at   | 1.25       | 0.078 |
| IQSEC1 | 46 | 203906_at   | 1.43       | 0.079 |
| CPNE   | 46 | 210408_s_at | 1.25       | 0.086 |
|        | 46 | 215700_x_at | 1.15       | 0.089 |

SMRI, Stanley Medical Research Institute; BA, Brodmann Area; FC, fold change;  $p$ ,  $p$  value
